# Supplementary material for: Electrochemical determination of PIK3CA gene associated with breast cancer based on molybdenum disulfide nanosheet-supported poly(indole-6-carboxylic acid)
Source: Royal Society of Chemistry journal article supplement (doi:10.1039/c8ay02425a), 2018-11-27
Supplement: c8ay02425a1.pdf [file c8ay02425a1.pdf]

## Supplementary material

# Electrochemical determination of PIK3CA gene from breast cancer based on molybdenum disulfide nanosheets supported poly(indole-6-carboxylic acid)

Jimin Yang<sup>1</sup>, Xuesong Yin<sup>1</sup>, Wei Zhang\*

*School of Chemistry and Chemical Engineering, Linyi University, Linyi 276005, China*

*\*E-mail: zhangweiqust@126.com(W. Zhang)*

*<sup>1</sup>These two authors contributed equally to this work.*

## 2. Materials and methods

### 2.3. Immobilization and hybridization of DNA

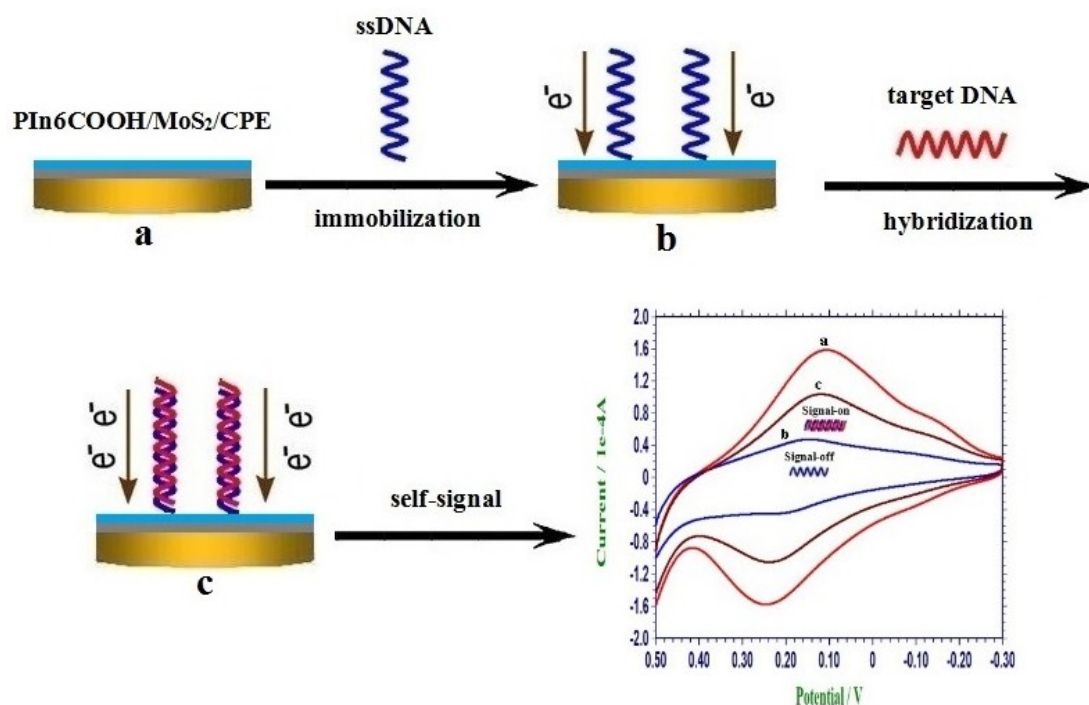

Scheme S1 The schematic illustration of the detection process and principle of the self-signal electrochemical sensing platform.
